# Supplementary material
Source: PubMed Central journal article supplement (PMC4117367)
Supplement: supp_WNL.0000000000000596_Figure_e-1.pdf [file supp_WNL.0000000000000596_Figure_e-1.pdf]

**Figure e-1. Survival analysis of longitudinal data from mutation carriers in the DIAN observational study.**

Kaplan-Meier survival curve with 95% confidence bounds

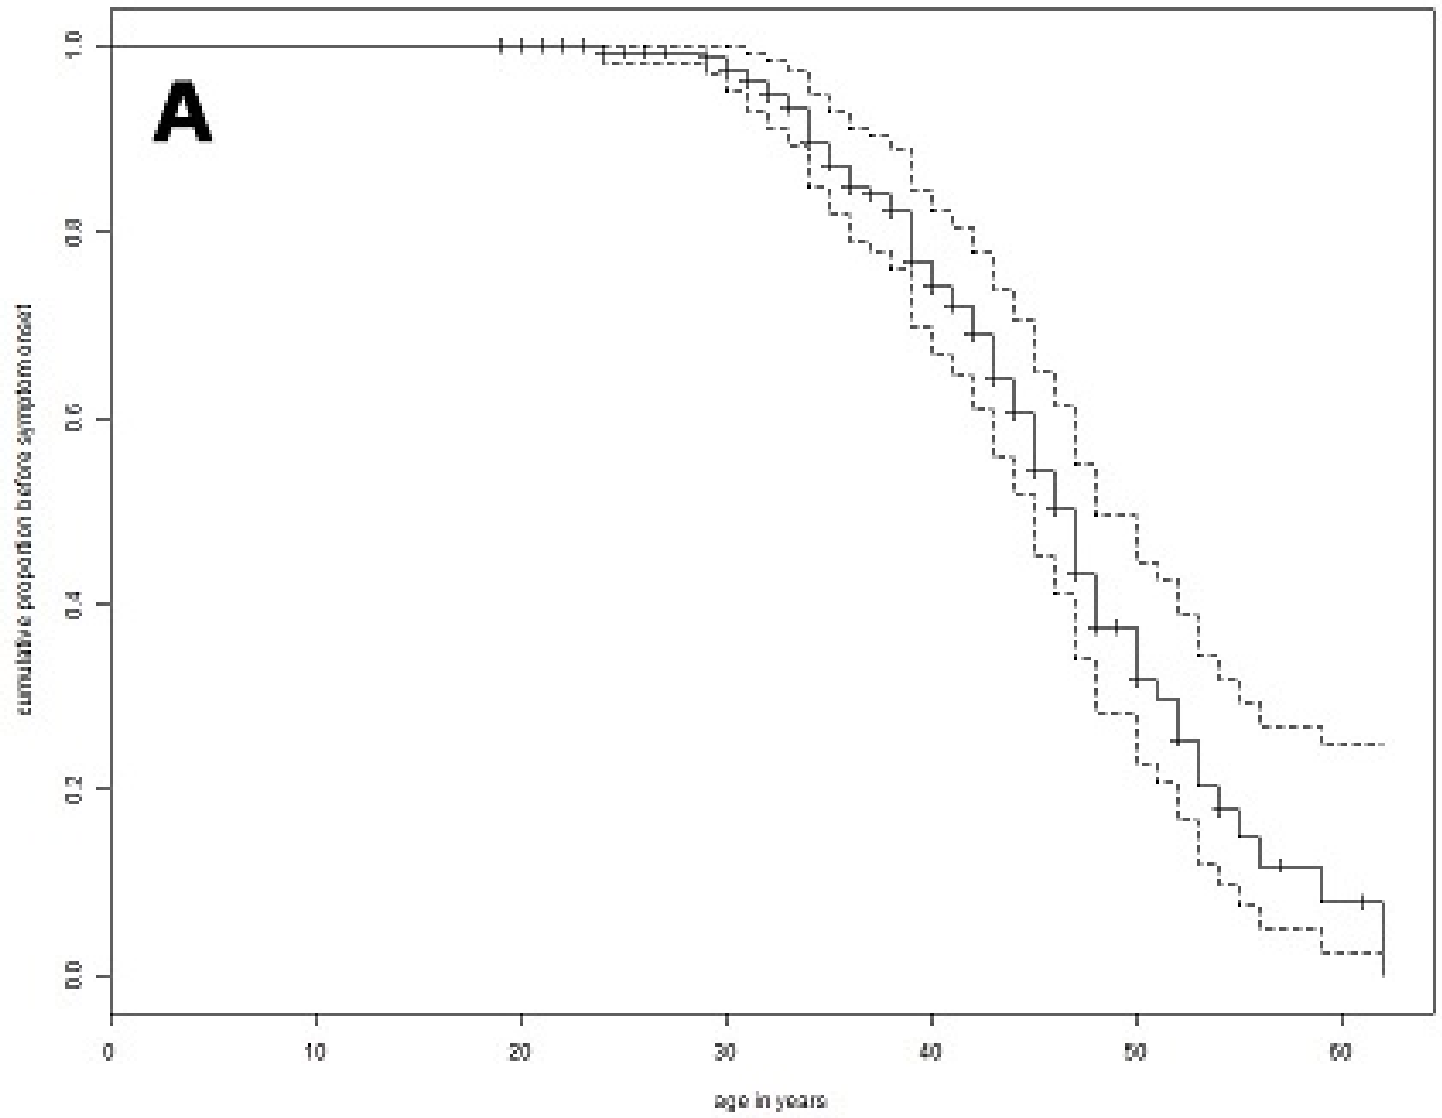

Kaplan-Meier survival curve for P81 mutations

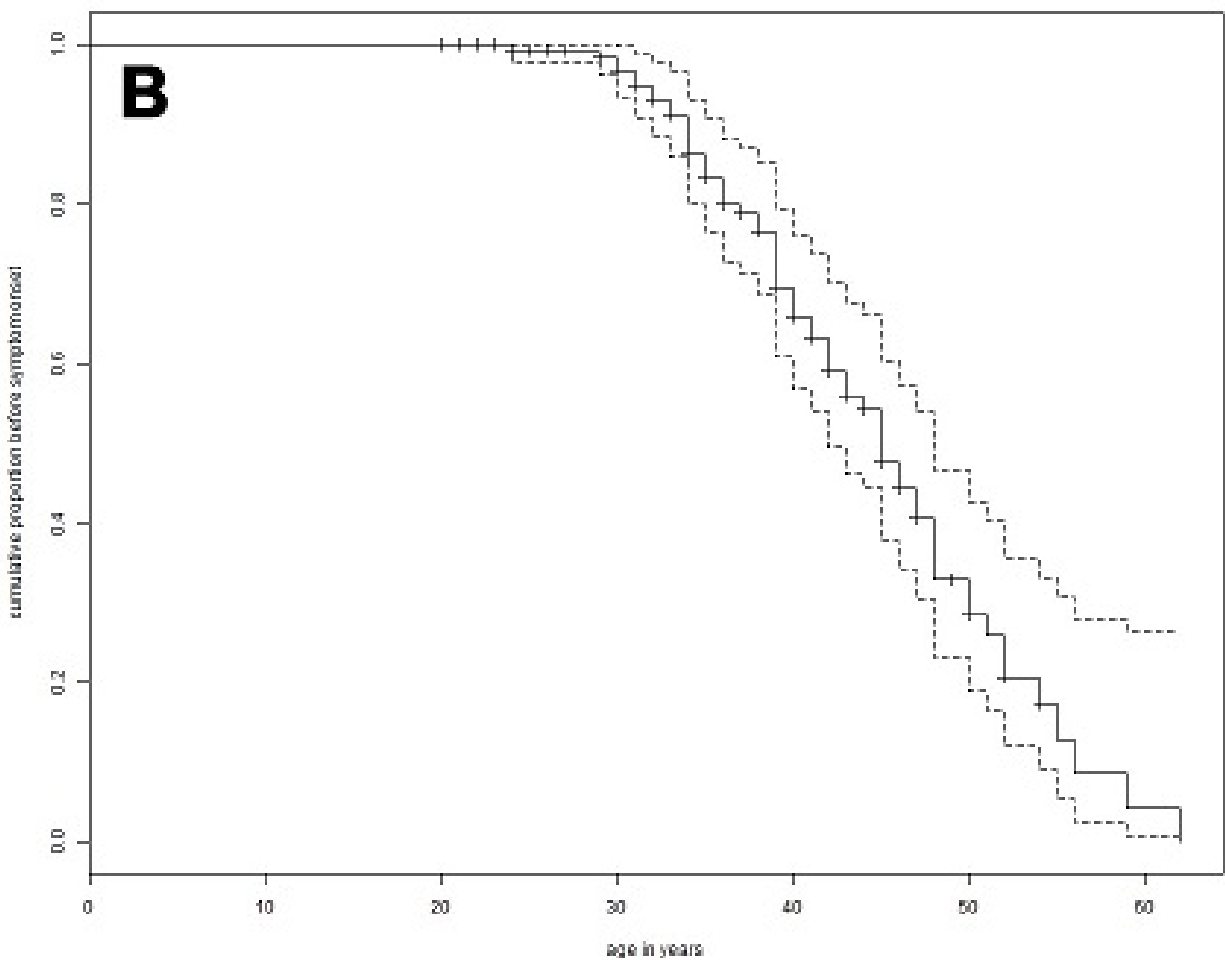

Kaplan-Meier survival curve for APP mutations

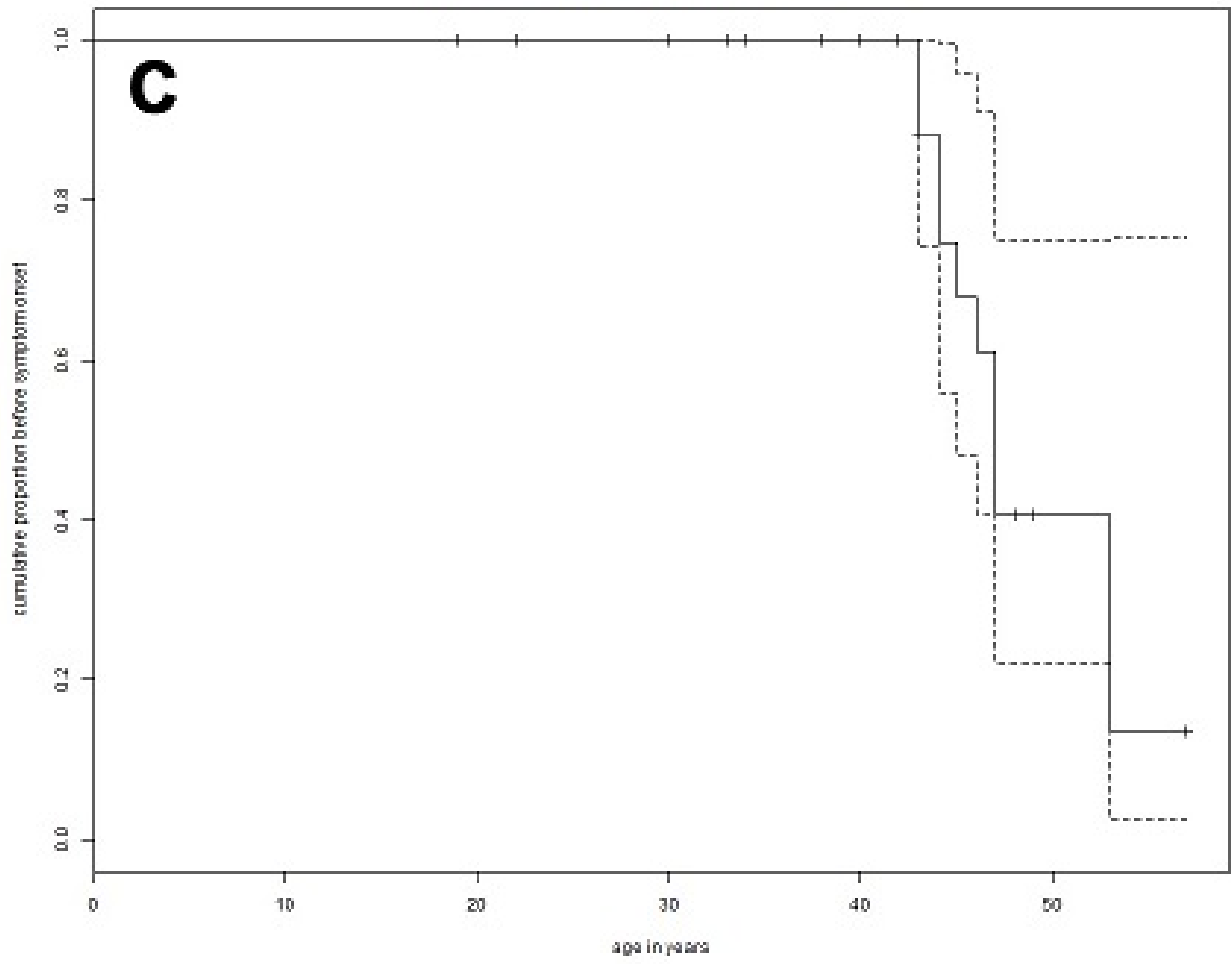

Kaplan-Meier survival curves show survival to symptom onset for all ADAD mutation carriers in the DIAN observational study. For participants who are currently presymptomatic, data were censored as of the age at last assessment.
